# Supplementary material for: Multiscale criticality measures as general-purpose gauges of proper brain function
Source: PubMed Central journal article supplement (PMC8280148; doi:10.1038/s41598-021-93880-8), 2021-07-14
Supplement: 41598_2021_93880_MOESM1_ESM.pdf [file 41598_2021_93880_MOESM1_ESM.pdf]

SUPPLEMENTARY INFORMATION for Multiscale criticality  
measures as general-purpose gauges of proper brain function

Tomer Fekete, Hermann Hinrichs, Jacobo Diego Sitt, Hans-Jochen Heinze, Oren Shriki.

| Group/measure       | $a_\sigma$          | $b_\sigma$          | $a_\alpha$        | $b_\alpha$          | $a_\tau$            |
|---------------------|---------------------|---------------------|-------------------|---------------------|---------------------|
| Control             | -0.025±0.032        | 1.4±0.053           | 0.025±0.003       | -1.3±0.021          | 0.019±0.013         |
| EMC                 | 0.062±0.0096        | 1.3±0.041           | 0.028±0.0024      | -1.4±0.014          | 0.036±0.0051        |
| MC                  | 0.083±0.0046        | 1.4±0.034           | 0.028±0.0011      | -1.4±0.012          | 0.03±0.0041         |
| VS                  | 0.11±0.0054         | 1.3±0.031           | 0.029±0.0011      | -1.4±0.012          | 0.043±0.0035        |
| Group/measure       | $b_{\sigma,\alpha}$ | $a_{\sigma,\tau}$   | $b_{\sigma,\tau}$ | $a_{\sigma,\gamma}$ | $b_{\sigma,\gamma}$ |
| Control             | -1.8±0.14           | 0.68±0.12           | -3.1±0.16         | 0.59±0.16           | -2.2±0.21           |
| EMC                 | -1.7±0.085          | 0.44±0.057          | -2.6±0.061        | 0.38±0.085          | -1.7±0.087          |
| MC                  | -1.8±0.025          | 0.3±0.052           | -2.4±0.071        | 0.23±0.068          | -1.5±0.09           |
| VS                  | -1.7±0.019          | 0.42±0.036          | -2.6±0.049        | 0.3±0.054           | -1.5±0.069          |
| Group/measure       | $a_{\alpha,\delta}$ | $b_{\alpha,\delta}$ | $a_{\tau,\gamma}$ | $b_{\tau,\gamma}$   | $a_{\tau,\delta}$   |
| Control             | -3.7±0.54           | -6.6±0.59           | 0.85±0.13         | 0.43±0.29           | -0.77±0.45          |
| EMC                 | -2.5±0.23           | -5.4±0.3            | 1.3±0.25          | 1.5±0.52            | -2.2±0.45           |
| MC                  | -1.9±0.11           | -4.5±0.14           | 0.93±0.11         | 0.66±0.23           | -0.63±0.21          |
| VS                  | -1.6±0.11           | -4±0.15             | 0.76±0.12         | 0.37±0.25           | -0.85±0.14          |
| $b_\tau$            | $a_\gamma$          | $b_\gamma$          | $a_\delta$        | $b_\delta$          | $a_{\sigma,\alpha}$ |
| -2.2±0.026          | 0.022±0.0083        | -1.4±0.033          | -                 | -1.8±0.038          | 0.34±0.093          |
| -2.1±0.023          | 0.031±0.0041        | -1.2±0.034          | -                 | -1.9±0.034          | 0.28±0.064          |
| -2.1±0.016          | 0.023±0.0042        | -1.3±0.021          | -                 | -1.8±0.028          | 0.34±0.016          |
| -2.1±0.013          | 0.026±0.0048        | -1.2±0.022          | -                 | -1.8±0.025          | 0.26±0.013          |
| $a_{\sigma,\delta}$ | $b_{\sigma,\delta}$ | $a_{\alpha,\tau}$   | $b_{\alpha,\tau}$ | $a_{\alpha,\gamma}$ | $b_{\alpha,\gamma}$ |
| -0.73±0.26          | -0.89±0.34          | 0.014±0.69          | -2.1±0.88         | 0.61±0.46           | -0.58±0.61          |
| -0.52±0.22          | -1.3±0.27           | 1.2±0.13            | -0.45±0.19        | 1.3±0.24            | 0.46±0.36           |
| -0.67±0.055         | -0.96±0.087         | 0.88±0.16           | -0.86±0.21        | 0.82±0.19           | -0.17±0.25          |
| -0.41±0.036         | -1.3±0.051          | 1.5±0.15            | 0.07±0.2          | 1.2±0.27            | 0.48±0.36           |
| $b_{\tau,\delta}$   | $a_{\gamma,\delta}$ | $b_{\gamma,\delta}$ | $\kappa$          | $\kappa_{gen}$      | $\alpha_{dropoff}$  |
| -3.4±1              | -1.1±0.45           | -3.3±0.69           | 1±0.0025          | 0.97±0.002          | 2.1e+02±26          |
| -6.7±0.95           | -1.3±0.2            | -3.5±0.29           | 1±0.0019          | 0.98±0.0012         | 2.8e+02±22          |
| -3.1±0.47           | -0.68±0.17          | -2.7±0.24           | 1±0.0016          | 0.98±0.001          | 2.8e+02±14          |
| -3.6±0.3            | -0.36±0.11          | -2.2±0.15           | 1±0.0014          | 0.98±0.0011         | 2.8e+02±12          |

*Supplementary Table 1: Group averages and standard errors of the 33 MsCr measures used in this study derived from the DOC dataset*

|                     |                     |                     |                   |                     |                     |
|---------------------|---------------------|---------------------|-------------------|---------------------|---------------------|
| Group/measure       | $a_\sigma$          | $b_\sigma$          | $a_\alpha$        | $b_\alpha$          | $a_\tau$            |
| Control             | 0.03±0.0032         | 0.58±0.017          | 0.036±0.0016      | -1.6±0.015          | 0.063±0.0058        |
| MCI                 | 0.013±0.0056        | 0.77±0.044          | 0.027±0.0016      | -1.5±0.017          | 0.025±0.0056        |
| Group/measure       | $b_{\sigma,\alpha}$ | $a_{\sigma,\tau}$   | $b_{\sigma,\tau}$ | $a_{\sigma,\gamma}$ | $b_{\sigma,\gamma}$ |
| Control             | -2±0.029            | 1.9±0.11            | -3.5±0.052        | 2.1±0.15            | -2.8±0.086          |
| MCI                 | -1.7±0.046          | 1.2±0.088           | -3.2±0.053        | 1.1±0.14            | -2.3±0.11           |
| Group/measure       | $a_{\alpha,\delta}$ | $b_{\alpha,\delta}$ | $a_{\tau,\gamma}$ | $b_{\tau,\gamma}$   | $a_{\tau,\delta}$   |
| Control             | -2±0.11             | -4.9±0.17           | 1.2±0.051         | 1.4±0.13            | -0.72±0.037         |
| MCI                 | -2.3±0.13           | -5±0.22             | 1.1±0.069         | 0.95±0.16           | -0.23±0.085         |
| $b_\tau$            | $a_\gamma$          | $b_\gamma$          | $a_\delta$        | $b_\delta$          | $a_{\sigma,\alpha}$ |
| -2.4±0.02           | 0.091±0.0045        | -1.5±0.024          | -                 | -1.6±0.014          | 0.71±0.045          |
| -2.4±0.016          | 0.048±0.0086        | -1.6±0.025          | -                 | -1.5±0.023          | 0.28±0.055          |
| $a_{\sigma,\delta}$ | $b_{\sigma,\delta}$ | $a_{\alpha,\tau}$   | $b_{\alpha,\tau}$ | $a_{\alpha,\gamma}$ | $b_{\alpha,\gamma}$ |
| -1.2±0.13           | -0.9±0.076          | 1.6±0.11            | 0.22±0.17         | 2.5±0.11            | 2.6±0.19            |
| -0.33±0.13          | -1.3±0.087          | 0.58±0.19           | -1.4±0.27         | 1.7±0.35            | 1.2±0.52            |
| $b_{\tau,\delta}$   | $a_{\gamma,\delta}$ | $b_{\gamma,\delta}$ | $\kappa$          | $\kappa_{gen}$      | $\alpha_{dropoff}$  |
| -3.3±0.094          | -0.72±0.042         | -2.7±0.073          | 0.98±0.00077      | 0.99±0.0011         | 43±3.5              |
| -2.1±0.22           | -0.49±0.085         | -2.2±0.15           | 0.99±0.002        | 0.98±0.0013         | 61±7.6              |

*Supplementary Table 2: Group averages and standard errors of the 33 MsCr measures used in this study derived from the MCI dataset*

|                     |                     |                     |                    |                     |                     |
|---------------------|---------------------|---------------------|--------------------|---------------------|---------------------|
| Group/measur<br>e   | $a_\sigma$          | $b_\sigma$          | $a_\alpha$         | $b_\alpha$          | $a_\tau$            |
| Control             | 0.013±0.005<br>5    | 1.1±0.068           | 0.0093±0.0004<br>3 | -1.3±0.009          | 0.027±0.0016        |
| Schiz               | 0.06±0.041          | 1.4±0.22            | 0.011±0.00065      | -1.3±0.015          | 0.016±0.0022        |
| Group/measur<br>e   | $b_{\sigma,\alpha}$ | $a_{\sigma,\tau}$   | $b_{\sigma,\tau}$  | $a_{\sigma,\gamma}$ | $b_{\sigma,\gamma}$ |
| Control             | -1.4±0.02           | 0.34±0.047          | -2.6±0.05          | 0.28±0.097          | -1.6±0.1            |
| Schiz               | -1.3±0.028          | 0.2±0.066           | -2.5±0.067         | 0.2±0.13            | -1.6±0.13           |
| Group/measur<br>e   | $a_{\alpha,\delta}$ | $b_{\alpha,\delta}$ | $a_{\tau,\gamma}$  | $b_{\tau,\gamma}$   | $a_{\tau,\delta}$   |
| Control             | -3.5±0.15           | -6.2±0.2            | 1.6±0.13           | 2.3±0.28            | -0.99±0.074         |
| Schiz               | -2.8±0.21           | -5.1±0.27           | 1.2±0.16           | 1.4±0.36            | -0.83±0.17          |
| $b_\tau$            | $a_\gamma$          | $b_\gamma$          | $a_\delta$         | $b_\delta$          | $a_{\sigma,\alpha}$ |
| -2.3±0.018          | 0.042±0.002<br>3    | -1.3±0.024          | -0.035±0.0011      | -1.7±0.012          | 0.082±0.016         |
| -2.3±0.018          | 0.027±0.003         | -1.4±0.028          | -0.032±0.0017      | -1.6±0.02           | 0.065±0.024         |
| $a_{\sigma,\delta}$ | $b_{\sigma,\delta}$ | $a_{\alpha,\tau}$   | $b_{\alpha,\tau}$  | $a_{\alpha,\gamma}$ | $b_{\alpha,\gamma}$ |
| -0.2±0.061          | -1.5±0.063          | 2.9±0.18            | 1.5±0.23           | 4.5±0.4             | 4.5±0.53            |
| -0.14±0.08          | -1.5±0.083          | 1.5±0.18            | -0.29±0.23         | 2.4±0.37            | 1.7±0.46            |
| $b_{\tau,\delta}$   | $a_{\gamma,\delta}$ | $b_{\gamma,\delta}$ | $\kappa$           | $\kappa_{gen}$      | $\alpha_{dropoff}$  |
| -4±0.17             | -0.54±0.038         | -2.5±0.057          | 1±0.0027           | 0.97±0.0007<br>4    | 1.9e+02±12          |
| -3.5±0.39           | -0.48±0.085         | -2.3±0.13           | 1±0.0025           | 0.96±0.0018         | 1.6e+02±13          |

*Supplementary Table 3: Group averages and standard errors of the 33 MsCr measures used in this study derived from the Schizophrenia dataset.*

|                     |                     |                     |                   |                     |                     |
|---------------------|---------------------|---------------------|-------------------|---------------------|---------------------|
| Group/measure       | $a_\sigma$          | $b_\sigma$          | $a_\alpha$        | $b_\alpha$          | $a_\tau$            |
| preictal            | 0.031±0.00043       | 0.44±0.002          | 0.035±0.00067     | -1.8±0.0029         | 0.061±0.00082       |
| interictal          | 0.033±0.00046       | 0.45±0.0023         | 0.037±0.003       | -1.8±0.0074         | 0.061±0.00088       |
| Group/measure       | $b_{\sigma,\alpha}$ | $a_{\sigma,\tau}$   | $b_{\sigma,\tau}$ | $a_{\sigma,\gamma}$ | $b_{\sigma,\gamma}$ |
| preictal            | -2.2±0.0072         | 1.8±0.021           | -3.2±0.0089       | 1.9±0.032           | -2.3±0.013          |
| interictal          | -2.1±0.015          | 1.7±0.026           | -3.1±0.01         | 1.6±0.087           | -2.2±0.042          |
| Group/measure       | $a_{\alpha,\delta}$ | $b_{\alpha,\delta}$ | $a_{\tau,\gamma}$ | $b_{\tau,\gamma}$   | $a_{\tau,\delta}$   |
| preictal            | -1.1±0.017          | -3.5±0.028          | 1.2±0.01          | 1.3±0.024           | -0.4±0.012          |
| interictal          | -1±0.018            | -3.3±0.03           | 1.1±0.01          | 1.2±0.025           | -0.36±0.013         |
| $b_\tau$            | $a_\gamma$          | $b_\gamma$          | $a_\delta$        | $b_\delta$          | $a_{\sigma,\alpha}$ |
| -2.5±0.004          | 0.067±0.001         | -1.6±0.0049         | -                 | -1.5±0.0042         | 0.97±0.016          |
| -2.4±0.0043         | 0.064±0.001         | -1.5±0.0052         | -                 | -1.5±0.0044         | 0.97±0.11           |
| $a_{\sigma,\delta}$ | $b_{\sigma,\delta}$ | $a_{\alpha,\tau}$   | $b_{\alpha,\tau}$ | $a_{\alpha,\gamma}$ | $b_{\alpha,\gamma}$ |
| -1.1±0.027          | -1.1±0.011          | 1.7±0.022           | 0.52±0.038        | 2±0.032             | 1.9±0.055           |
| -0.89±0.048         | -1.1±0.022          | 1.7±0.022           | 0.5±0.037         | 1.9±0.031           | 1.8±0.054           |
| $b_{\tau,\delta}$   | $a_{\gamma,\delta}$ | $b_{\gamma,\delta}$ | $\kappa$          | $\kappa_{gen}$      | $\alpha_{dropoff}$  |
| -2.5±0.031          | -0.34±0.0086        | -2.1±0.016          | 0.96±0.00029      | 0.99±0.00016        | 27±1.2              |
| -2.4±0.033          | -0.28±0.009         | -2±0.016            | 0.96±0.00047      | 0.99±0.00015        | 34±1.7              |

*Supplementary Table 4: Group averages and standard errors of the 33 MsCr measures used in this study derived from the epilepsy dataset.*

| Data/measure | $a_\sigma$          | $b_\sigma$          | $a_\alpha$        | $b_\alpha$          | $a_\tau$            | $b_\tau$            | $a_\gamma$          | $b_\gamma$          | $a_\delta$        | $b_\delta$          | $a_{\sigma,\alpha}$ |
|--------------|---------------------|---------------------|-------------------|---------------------|---------------------|---------------------|---------------------|---------------------|-------------------|---------------------|---------------------|
| DOC          | ***                 |                     |                   |                     |                     | *                   |                     | **                  | **                |                     |                     |
| MCI          |                     | **                  | **                | **                  | ***                 |                     | **                  |                     |                   | *                   | ***                 |
| Schiz        |                     |                     |                   |                     |                     |                     |                     |                     |                   |                     |                     |
| Epilepsy     | ***                 | **                  |                   |                     |                     | **                  |                     | ***                 | ***               |                     |                     |
| Data/measure | $b_{\sigma,\alpha}$ | $a_{\sigma,\tau}$   | $b_{\sigma,\tau}$ | $a_{\sigma,\gamma}$ | $b_{\sigma,\gamma}$ | $a_{\sigma,\delta}$ | $b_{\sigma,\delta}$ | $a_{\alpha,\tau}$   | $b_{\alpha,\tau}$ | $a_{\alpha,\gamma}$ | $b_{\alpha,\gamma}$ |
| DOC          |                     |                     | **                |                     | *                   |                     |                     | *                   | *                 |                     |                     |
| MCI          | ***                 | ***                 | **                | ***                 | **                  | ***                 | **                  | ***                 | ***               |                     |                     |
| Schiz        |                     |                     |                   |                     |                     |                     |                     |                     |                   |                     |                     |
| Epilepsy     |                     | ***                 | ***               | *                   | *                   | *                   |                     |                     |                   |                     |                     |
| Data/measure | $a_{\alpha,\delta}$ | $b_{\alpha,\delta}$ | $a_{\tau,\gamma}$ | $b_{\tau,\gamma}$   | $a_{\tau,\delta}$   | $b_{\tau,\delta}$   | $a_{\gamma,\delta}$ | $b_{\gamma,\delta}$ | $\kappa$          | $\kappa_{gen}$      | $\alpha_{dropoff}$  |
| DOC          | ***                 | ***                 |                   |                     | *                   | *                   |                     |                     |                   | *                   |                     |
| MCI          |                     |                     |                   |                     | ***                 | ***                 |                     | *                   |                   | **                  |                     |
| Schiz        |                     |                     |                   |                     |                     |                     |                     |                     |                   |                     |                     |
| Epilepsy     | ***                 | ***                 |                   |                     |                     |                     | ***                 | ***                 | ***               |                     | *                   |

*Supplementary Table 5: Significance of MsCr features across all data sets employing parametric statistics. \*denotes  $p < 0.01$  \*\*denotes  $p < 0.001$  \*\*\*denotes  $p < 0.0001$*

| Data/measure | $a_\sigma$          | $b_\sigma$          | $a_\alpha$        | $b_\alpha$          | $a_\tau$            | $b_\tau$            | $a_\gamma$          | $b_\gamma$          | $a_\delta$        | $b_\delta$          | $a_{\sigma,\alpha}$ |
|--------------|---------------------|---------------------|-------------------|---------------------|---------------------|---------------------|---------------------|---------------------|-------------------|---------------------|---------------------|
| DOC          | ***                 |                     |                   |                     |                     | *                   |                     | **                  | ***               |                     | *                   |
| MCI          |                     | *                   | *                 | *                   | **                  |                     |                     |                     |                   |                     | **                  |
| Schiz        |                     | *                   |                   |                     | **                  |                     | *                   |                     |                   | ***                 |                     |
| Epilepsy     | ***                 | ***                 |                   | **                  |                     | ***                 |                     | ***                 | ***               |                     | ***                 |
| Data/measure | $b_{\sigma,\alpha}$ | $a_{\sigma,\tau}$   | $b_{\sigma,\tau}$ | $a_{\sigma,\gamma}$ | $b_{\sigma,\gamma}$ | $a_{\sigma,\delta}$ | $b_{\sigma,\delta}$ | $a_{\alpha,\tau}$   | $b_{\alpha,\tau}$ | $a_{\alpha,\gamma}$ | $b_{\alpha,\gamma}$ |
| DOC          |                     |                     | *                 |                     | *                   | *                   |                     | *                   | *                 |                     |                     |
| MCI          | **                  | **                  | *                 | **                  | *                   | **                  |                     | *                   | *                 |                     |                     |
| Schiz        |                     |                     |                   |                     |                     |                     |                     | ***                 | ***               | **                  | **                  |
| Epilepsy     | ***                 | ***                 | ***               | ***                 | ***                 | ***                 | ***                 |                     |                   |                     |                     |
| Data/measure | $a_{\alpha,\delta}$ | $b_{\alpha,\delta}$ | $a_{\tau,\gamma}$ | $b_{\tau,\gamma}$   | $a_{\tau,\delta}$   | $b_{\tau,\delta}$   | $a_{\gamma,\delta}$ | $b_{\gamma,\delta}$ | $\kappa$          | $\kappa_{gen}$      | $\alpha_{dropoff}$  |
| DOC          | ***                 | ***                 |                   |                     | *                   | *                   | *                   | *                   |                   | *                   |                     |
| MCI          |                     |                     |                   |                     | *                   | *                   |                     |                     |                   | *                   |                     |
| Schiz        |                     |                     |                   |                     |                     |                     |                     |                     |                   | *                   |                     |
| Epilepsy     | ***                 | ***                 | *                 |                     | ***                 | ***                 | ***                 | ***                 | ***               |                     | ***                 |

*Supplementary Table 6: Significance of MsCr features across all data sets employing non-parametric statistics. \*denotes  $p < 0.01$  \*\*denotes  $p < 0.001$  \*\*\*denotes  $p < 0.0001$*
